# Supplementary material
Source: Springer Nature journal article supplement (https://www.springermedizin.de/resource/supplementary/12879_2014_3659_MOESM4_ESM.pdf/9446400)

**A**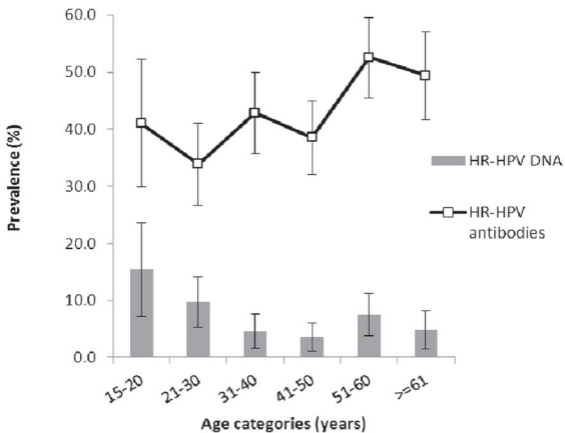**B**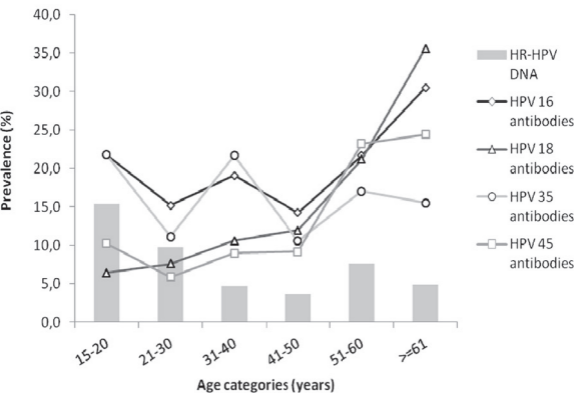

Supplement: MOESM4 [file 9446400]
